# Supplementary material for: Dysregulation of lysosomal morphology by pathogenic LRRK2 is corrected by TPC2 inhibition
Source: J Cell Sci. 2015 Jan 15;128(2):232–8. doi: 10.1242/jcs.164152 (PMC4294771; doi:10.1242/jcs.164152)
Supplement: Supplementary Material [file supp_128.2.232_JCS164152.pdf]

**Fig. S1. Pathogenic LRRK2 disrupts lysosomal morphology in multiple patients.** **A-C**, LAMP1 staining in fibroblasts derived from healthy controls (left) and age-matched PD patients harbouring the LRRK2 G2019S mutation (right). Scale bars, 5  $\mu$ m. **D-E**, Summary data for each control/patient pair quantifying LAMP1 intensity (**D**) or the proportion of cells displaying perinuclear lysosome clustering (**E**). Data are from 93-555 healthy control and 102-582 LRRK2-PD cells. Right panels show aggregate data for all four experimental pairs used in this study incorporating data from Fig. 1. \*\* $p < 0.01$ ; \*\*\* $p < 0.001$

**Fig. S2. Quantification of endogenous LAMP1, VPS35 and TPC levels in human fibroblasts.** **A**, Western blot analysis using antibodies to LAMP1 (left) or VPS35 (right) and fibroblast homogenates prepared from a healthy control or LRRK2-PD patient (10  $\mu$ g, LAMP1; 30  $\mu$ g VPS35). Blots were stripped and re-probed using an antibody to actin (bottom panels). Migration of molecular mass markers (in kDa) is shown on the left. Results of densitometric analysis quantifying the fold-change in protein levels in PD patients versus healthy control (3 pairs, 2-5 determinations per individual) are listed at the bottom. **B**, Western blot analysis using an antibody to TPC1 and fibroblast homogenates prepared from a LRRK2-PD patient (17  $\mu$ g) that were treated with a scrambled siRNA or siRNA to TPC1 or TPC2. Results of densitometric analysis quantifying the fold-change in TPC1 levels (bracketed area) in TPC siRNA-treated cells relative to scrambled siRNA (3 independent knock downs from 2 patients).

**Fig. S3. Lysosomal defects are reversed by acute inhibition of LRRK2 kinase, Rab7 and NAADP.** **A-H**, LAMP1 staining in fibroblasts from a healthy control (**A**) and a PD patient (**B-H**) treated for the indicated time with LRRK2-In1 (100 nM, **C-D**), the Rab7 GTPase

inhibitor, CID 1067700 (1  $\mu$ M, **E**), Ned-19 (100  $\mu$ M, **F-G**) and Ned-K (100  $\mu$ M, **H**). Scale bars, 5  $\mu$ m. **I**, Pooled data (n=50-78 cells). \*\*\*  $p<0.001$ .

**Fig. S4. Pathogenic LRRK2 disrupts lysosomal ultrastructure.** Electron micrograph of a LRRK2-PD fibroblast. Example of an hour-glass structure (\*). Scale bar, 500 nm.

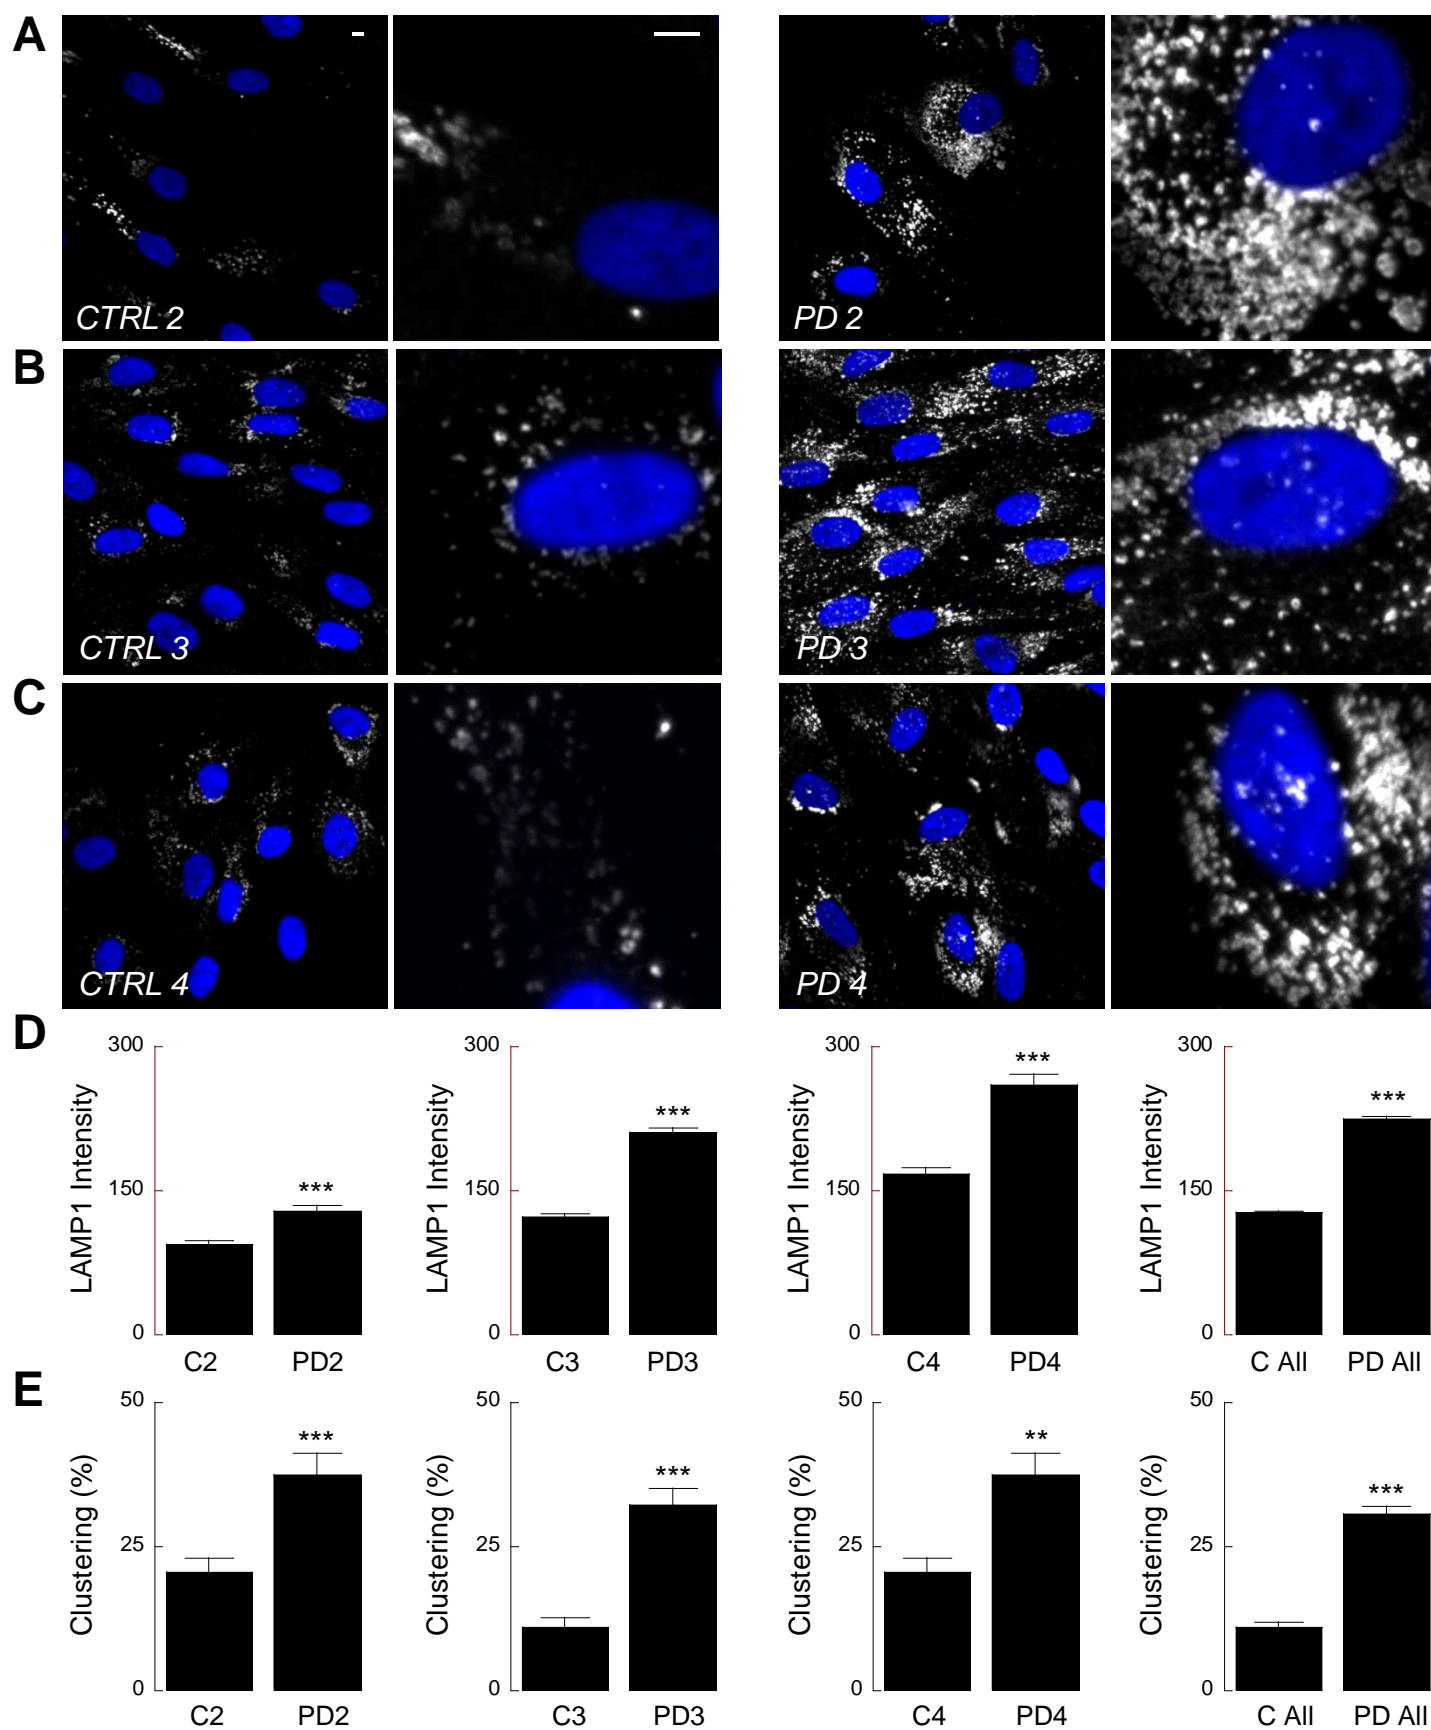

Figure S1

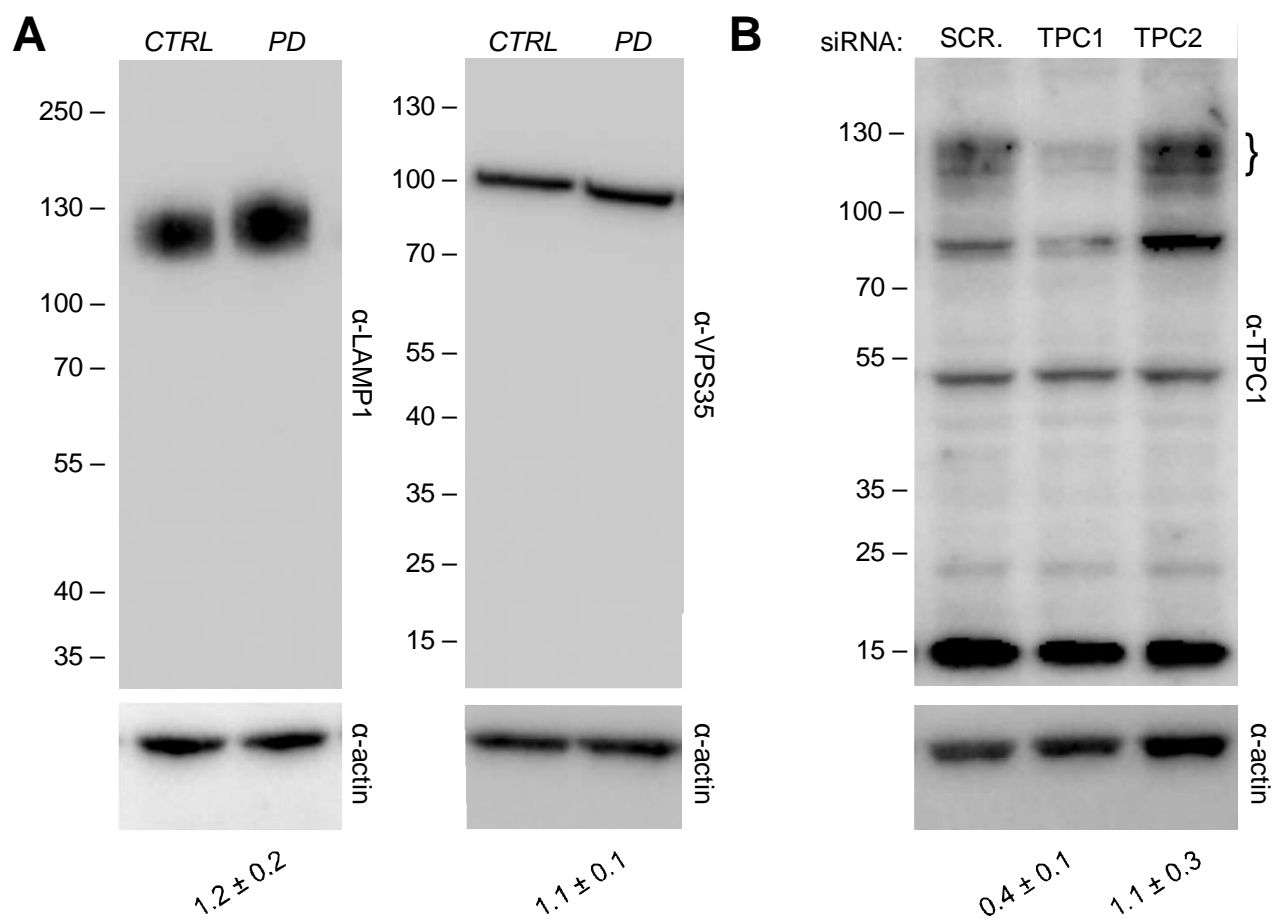

Figure S2

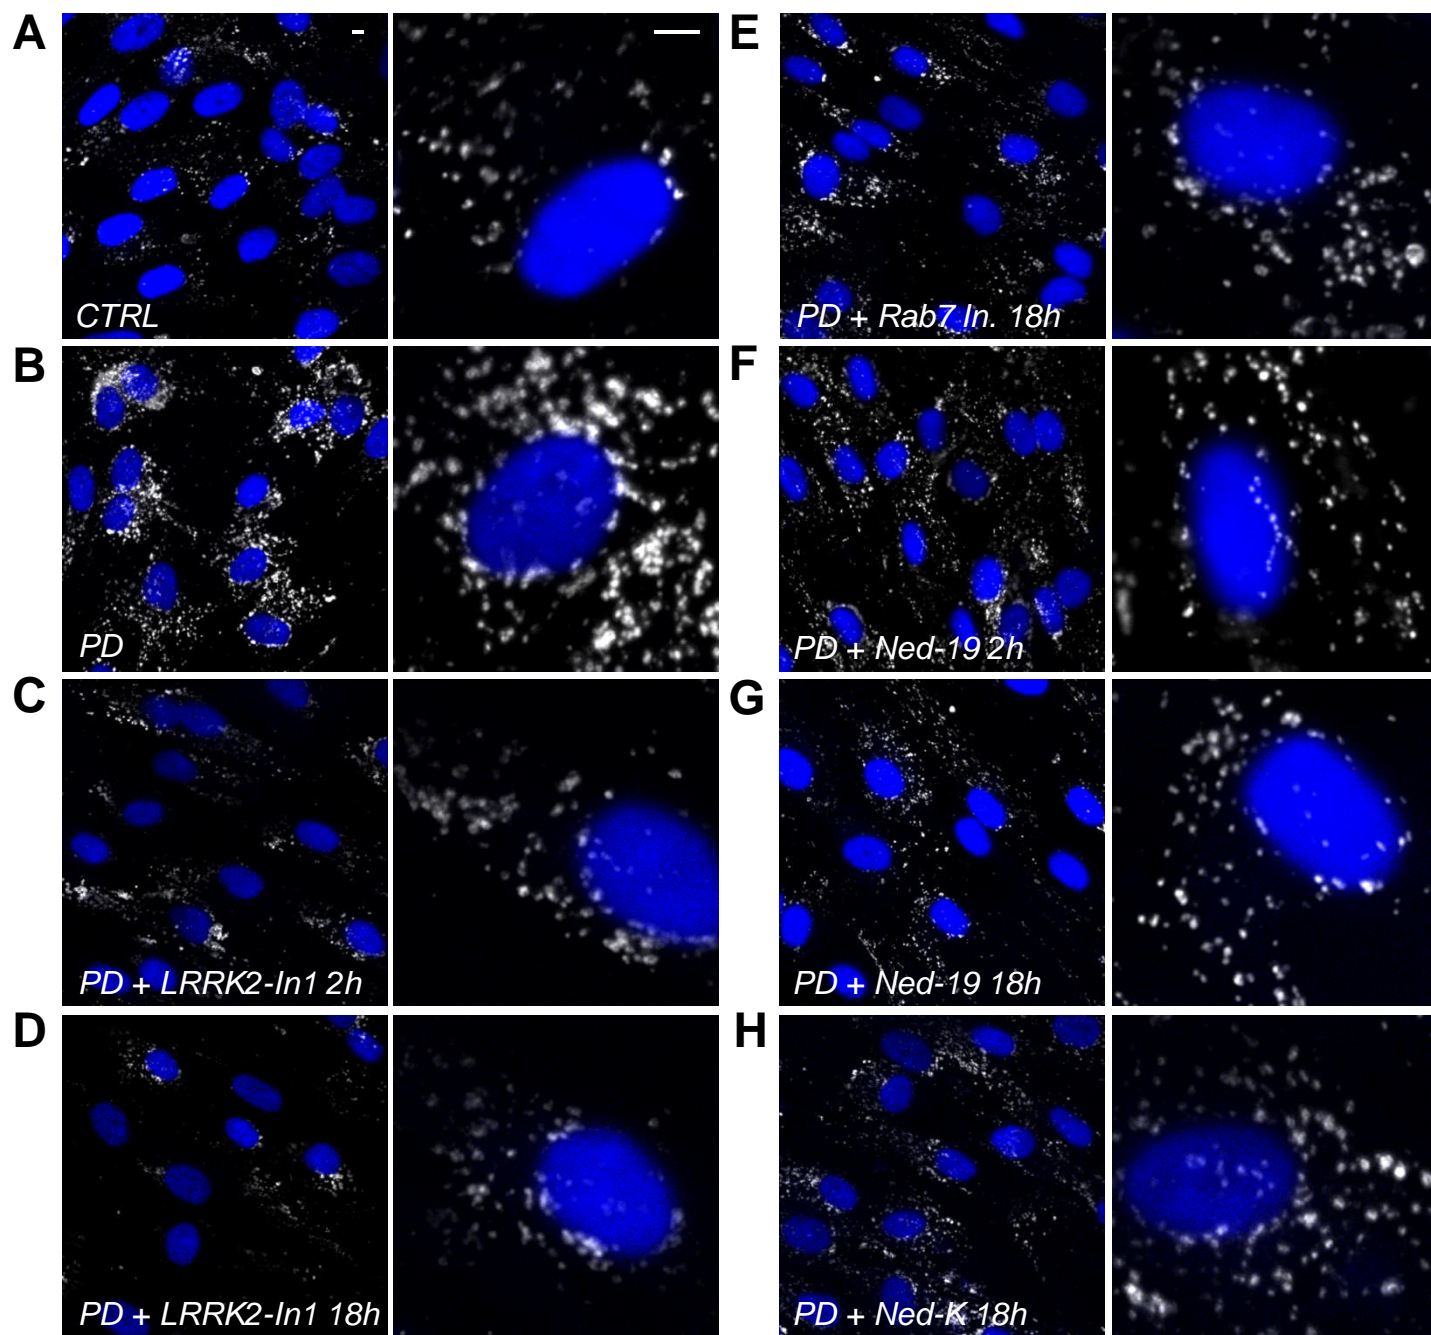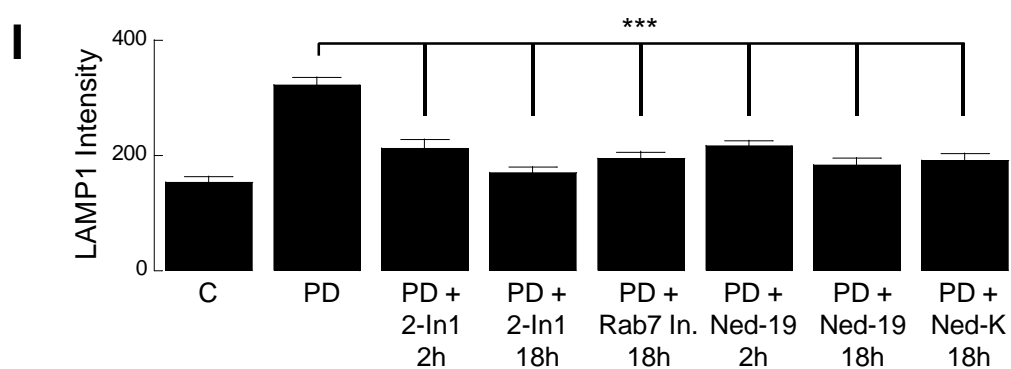

Figure S3

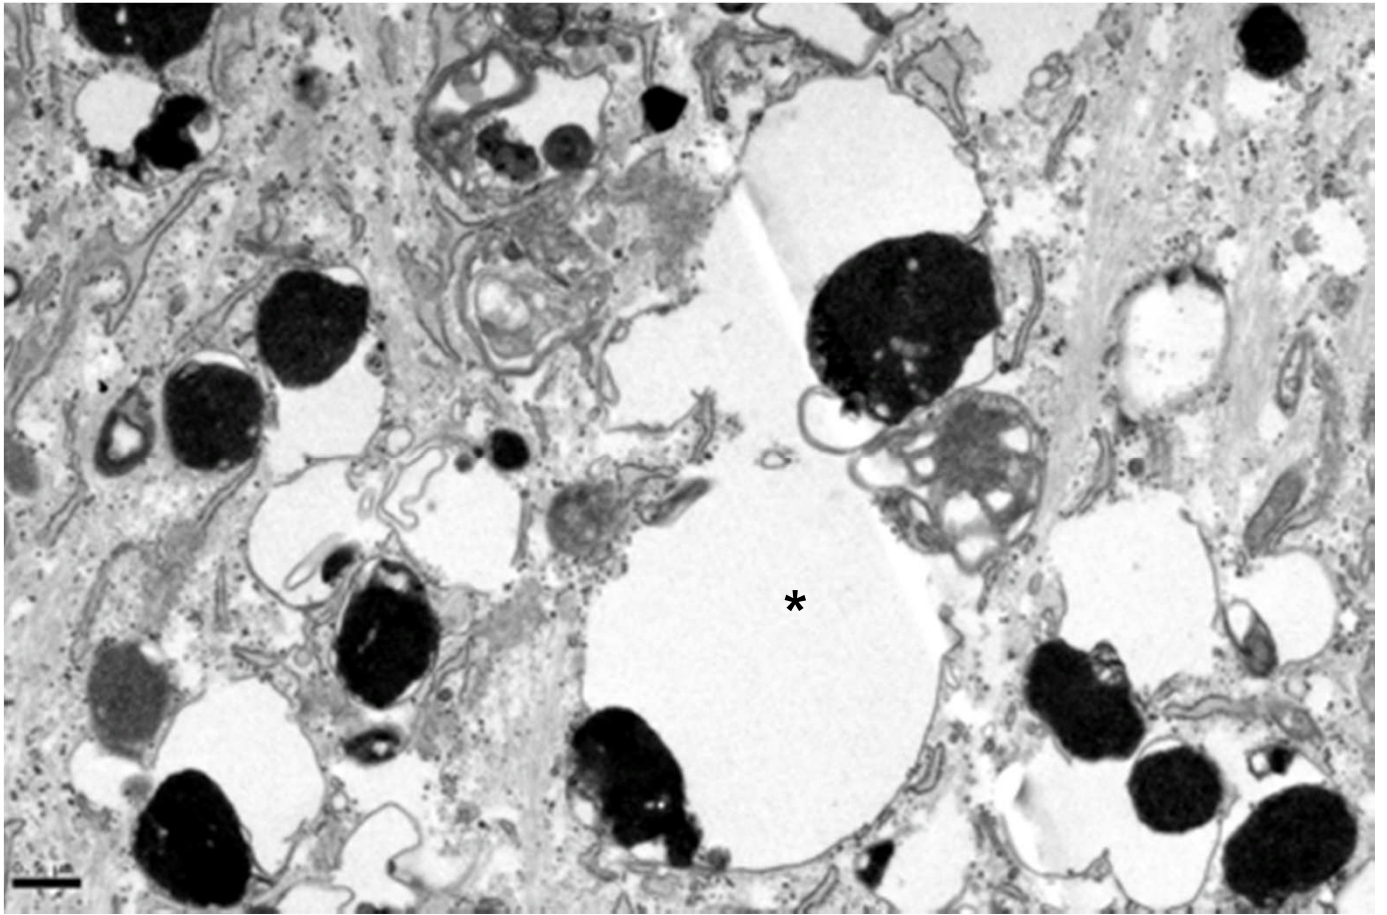

Figure S4
